# Supplementary material for: matK-QR classifier: a patterns based approach for plant species identification
Source: BioData Min. 2016 Dec 9;9:39. doi: 10.1186/s13040-016-0120-6 (PMC5148893; doi:10.1186/s13040-016-0120-6)
Supplement: Additional file 6: — The details of the recall, precision and F-measure values of signatures, BLASTn, SVM, Naive Bayesian, RIPPER, and C4.5 methods. (XLSX 14 kb) [file 13040_2016_120_MOESM6_ESM.xlsx]

## Sheet: Recall_Precision_F-measure
		Signatures			BLASTn			SVM			NB			RIPPER			C4.5
No.	Species names	Recall	Precision	F-measure	Recall	Precision	F-measure	Precision	Recall	F-Measure	Precision	Recall	F-Measure	Precision	Recall	F-Measure	Precision	Recall	F-Measure
1	Acer platanoides	1	1	1	0.5	0.5	0.5	1	1	1	0.5	1	0.67	0	0	0	0.25	0.5	0.33
2	Combretum hereroense	1	1	1	1	1	1	0.78	0.7	0.74	0	0	0	0.42	0.5	0.46	0.64	0.7	0.67
3	Croton gratissimus	1	1	1	1	1	1	0.75	0.75	0.75	0	0	0	0.5	0.5	0.5	0.6	0.75	0.67
4	Croton megalobotrys	1	1	1	0.75	0.75	0.75	0.43	0.75	0.55	0	0	0	0.67	0.5	0.57	0.75	0.75	0.75
5	Diphasiastrum digitatum	1	1	1	1	1	1	1	1	1	0.67	1	0.8	0	0	0	0.67	1	0.8
6	Eupatorium perfoliatum	1	1	1	0	0	0	0	0	0	0	0	0	0	0	0	0	0	0
7	Heteromorpha arborescens	1	1	1	0.83	0.83	0.83	1	0.83	0.91	0	0	0	0.2	0.33	0.25	0.57	0.67	0.62
8	Lycopodium obscurum	1	1	1	1	1	1	1	0.67	0.8	1	0.67	0.8	0	0	0	0.33	0.33	0.33
9	Myrothamnus flabellifolia	1	1	1	1	1	1	1	0.75	0.86	0.5	0.75	0.6	0.4	0.5	0.44	0.6	0.75	0.67
10	Poa compressa	1	1	1	0.33	0.33	0.33	0	0	0	0	0	0	0	0	0	0	0	0
11	Populus grandidentata	1	1	1	1	1	1	0.4	0.33	0.36	0	0	0	0.33	0.17	0.22	0.5	0.33	0.4
12	Rhamnus alnifolia	1	1	1	0.5	0.5	0.5	0	0	0	0	0	0	0	0	0	0	0	0
13	Sciuro-hypnum reflexum	1	1	1	0.5	0.5	0.5	0	0	0	0	0	0	0	0	0	0	0	0
14	Steganotaenia araliacea	1	1	1	1	1	1	0.71	1	0.83	0	0	0	0.71	1	0.83	0.75	0.6	0.67
15	Strychnos madagascariensis	1	1	1	1	1	1	0.4	0.5	0.44	0	0	0	0	0	0	0	0	0
16	Symphyotrichum pilosum	1	1	1	0.5	0.5	0.5	1	1	1	1	1	1	0	0	0	0.67	1	0.8
17	Vella pseudocytisus	1	1	1	0	0	0	1	1	1	0.5	1	0.67	0	0	0	1	0.5	0.67
18	Xerophyta retinervis	1	1	1	1	1	1	1	1	1	0.5	0.6	0.55	0.57	0.8	0.67	0.57	0.8	0.67
19	Trifolium repens	0.93	1	0.96	1	1	1	0.24	0.29	0.26	0.24	0.29	0.26	0.2	0.21	0.21	0.33	0.29	0.31
20	Solanum dulcamara	0.91	1	0.95	0.91	0.91	0.91	0.2	0.18	0.19	0	0	0	0.11	0.09	0.1	0.25	0.18	0.21
21	Populus tremuloides	0.88	1	0.93	0.88	0.88	0.88	0	0	0	0	0	0	0.17	0.13	0.14	0	0	0
22	Trifolium pratense	0.85	1	0.92	0.92	0.92	0.92	0.44	0.31	0.36	0.36	0.39	0.37	0.13	0.08	0.1	0.17	0.08	0.11
23	Rubus occidentalis	0.83	1	0.91	0.83	0.83	0.83	0.8	0.67	0.73	0.4	0.67	0.5	0.57	0.67	0.62	0.8	0.67	0.73
24	Plantago lanceolata	0.93	0.88	0.9	0.93	0.93	0.93	0.43	0.4	0.41	0.36	0.33	0.35	0.29	0.33	0.31	0.35	0.4	0.38
25	Acacia tortilis	0.8	1	0.89	0.6	0.6	0.6	0.75	0.6	0.67	0.33	0.4	0.36	0.38	0.6	0.46	0.43	0.6	0.5
26	Acer negundo	0.8	1	0.89	0.8	0.8	0.8	0.33	0.4	0.36	0.25	0.2	0.22	0	0	0	0.33	0.4	0.36
27	Fallopia convolvulus	0.8	1	0.89	0.8	0.8	0.8	0.5	0.2	0.29	0.2	0.2	0.2	0.29	0.2	0.24	0.14	0.1	0.12
28	Persicaria maculosa	0.8	1	0.89	0.6	0.6	0.6	0.33	0.2	0.25	0.29	0.2	0.24	0	0	0	0	0	0
29	Silene vulgaris	0.9	0.86	0.88	0.85	0.85	0.85	0.75	0.6	0.67	0.8	0.4	0.53	0.86	0.6	0.71	0.57	0.6	0.59
30	Brachylaena huillensis	1	0.75	0.86	0.67	0.67	0.67	0	0	0	0	0	0	0	0	0	0	0	0
31	Solanum panduriforme	1	0.75	0.86	0.67	0.67	0.67	1	1	1	0.3	1	0.46	0.33	0.33	0.33	1	1	1
32	Lactuca serriola	0.96	0.78	0.86	0.96	0.96	0.96	0.75	0.69	0.72	0.94	0.62	0.74	0.29	0.62	0.39	0.57	0.65	0.61
33	Croton pseudopulchellus	0.75	1	0.86	0.75	0.75	0.75	0.75	0.75	0.75	0	0	0	0	0	0	0.75	0.75	0.75
34	Equisetum hyemale	0.75	1	0.86	1	1	1	0	0	0	0	0	0	0	0	0	0	0	0
35	Picea glauca	0.75	1	0.86	1	1	1	0	0	0	0	0	0	0	0	0	0	0	0
36	Strychnos decussata	0.75	1	0.86	1	1	1	1	0.5	0.67	0	0	0	0	0	0	0.25	0.25	0.25
37	Strychnos spinosa	0.75	1	0.86	0.75	0.75	0.75	0.75	0.75	0.75	0.3	0.75	0.43	0	0	0	0.75	0.75	0.75
38	Poa annua	0.78	0.93	0.85	0.83	0.83	0.83	0.21	0.39	0.28	0.13	0.22	0.16	0.17	0.06	0.08	0.43	0.33	0.38
39	Plantago major	0.74	1	0.85	1	1	1	0.16	0.32	0.21	0.19	0.26	0.22	0.23	0.16	0.19	0.07	0.05	0.06
40	Cornus sericea	1	0.67	0.8	0.75	0.75	0.75	0	0	0	0	0	0	0	0	0	0	0	0
41	Rhamnus cathartica	1	0.67	0.8	0.75	0.75	0.75	0.17	0.17	0.17	0	0	0	0	0	0	0.08	0.08	0.08
42	Rhus transvaalensis	1	0.67	0.8	0	0	0	0	0	0	0	0	0	0	0	0	0	0	0
43	Cornus alternifolia	0.75	0.86	0.8	0.75	0.75	0.75	0.5	0.38	0.43	0.17	0.13	0.14	0.75	0.38	0.5	0.25	0.38	0.3
44	Cornus rugosa	0.67	1	0.8	0.33	0.33	0.33	0.67	0.67	0.67	0	0	0	0	0	0	0.4	0.67	0.5
45	Cornus racemosa	1	0.6	0.75	0	0	0	0.5	0.67	0.57	0	0	0	0	0	0	0.14	0.33	0.2
46	Viburnum lentago	0.6	1	0.75	0.4	0.4	0.4	0	0	0	0	0	0	0	0	0	0	0	0
47	Solanum nigrum	0.7	0.66	0.68	0.7	0.7	0.7	0.27	0.44	0.33	0.82	0.33	0.47	0.16	0.52	0.25	0.44	0.37	0.4
48	Acer saccharum	1	0.5	0.67	0.5	0.5	0.5	0	0	0	0	0	0	0	0	0	0	0	0
49	Lactuca canadensis	1	0.5	0.67	0	0	0	0.5	0.67	0.57	0.4	0.67	0.5	0	0	0	0	0	0
50	Plantago rugelii	0.5	1	0.67	0.83	0.83	0.83	0.57	0.67	0.62	0.5	0.67	0.57	0.43	0.5	0.46	0	0	0
51	Rubus idaeus	0.47	1	0.64	1	1	1	0.92	0.8	0.86	0.86	0.4	0.55	0.92	0.73	0.82	0.75	0.8	0.77
52	Rhus gueinzii	1	0.43	0.6	0.67	0.67	0.67	0.6	1	0.75	0.33	1	0.5	0	0	0	0.43	1	0.6
53	Viburnum opulus	0.42	1	0.59	0.79	0.79	0.79	0.44	0.53	0.48	0.67	0.32	0.43	0.64	0.37	0.47	0.41	0.47	0.44
54	Combretum apiculatum	0.73	0.47	0.57	0.55	0.55	0.55	0.62	0.73	0.67	0.29	0.36	0.32	0.33	0.36	0.35	0.53	0.73	0.62
55	Persicaria hydropiper	0.4	1	0.57	0.6	0.6	0.6	0.58	0.47	0.52	0.63	0.33	0.44	0.37	0.47	0.41	0.29	0.33	0.31
56	Combretum collinum	0.57	0.5	0.53	0	0	0	0.25	0.14	0.18	0	0	0	0	0	0	0	0	0
57	Symphyotrichum ericoides	1	0.33	0.5	0.5	0.5	0.5	0	0	0	0	0	0	0	0	0	0	0	0
58	Acacia nigrescens	1	0.3	0.46	0	0	0	1	0.67	0.8	0.2	0.67	0.31	0	0	0	0.67	0.67	0.67
59	Erigeron annuus	0.3	1	0.46	0.2	0.2	0.2	0.89	0.8	0.84	0.73	0.8	0.76	0.89	0.8	0.84	0.41	0.7	0.52
60	Acacia exuvialis	1	0.19	0.32	0	0	0	1	0.67	0.8	0	0	0	0	0	0	0	0	0
